# Supplementary material for: Cuban history of CRF19 recombinant subtype of HIV-1
Source: PubMed Central journal article supplement (PMC8376097; doi:10.1371/journal.ppat.1009786), 2021-08-09
Supplement: ppat.1009786.s001.pdf [file ppat.1009786.s001.pdf]

**S1 Table. Statistics on SDRMs not present in treatment-naive CRF19 sequences.**

| <b>SDRM</b> | <b>sequences with SDRM</b> | <b>prevalence</b> |
|-------------|----------------------------|-------------------|
| RT:K219E    | 19                         | 6.07%             |
| RT:T215F    | 19                         | 6.07%             |
| RT:K219Q    | 16                         | 5.11%             |
| PR:I84V     | 8                          | 2.56%             |
| RT:K65R     | 8                          | 2.56%             |
| PR:L24I     | 7                          | 2.24%             |
| RT:T215I    | 7                          | 2.24%             |
| PR:M46L     | 6                          | 1.92%             |
| RT:L100I    | 6                          | 1.92%             |
| PR:F53L     | 5                          | 1.60%             |
| PR:I54L     | 5                          | 1.60%             |
| PR:I54M     | 5                          | 1.60%             |
| PR:V32I     | 5                          | 1.60%             |
| RT:T69D     | 5                          | 1.60%             |
| PR:G48V     | 3                          | 0.96%             |
| PR:G73S     | 3                          | 0.96%             |
| RT:M230L    | 3                          | 0.96%             |
| RT:P225H    | 3                          | 0.96%             |
| RT:V106A    | 3                          | 0.96%             |
| RT:Y115F    | 3                          | 0.96%             |
| PR:I50V     | 2                          | 0.64%             |
| PR:V82T     | 2                          | 0.64%             |
| RT:K103S    | 2                          | 0.64%             |
| RT:K219R    | 2                          | 0.64%             |
| RT:T215V    | 2                          | 0.64%             |
| RT:V106M    | 2                          | 0.64%             |
| RT:Y181I    | 2                          | 0.64%             |
| PR:G73C     | 1                          | 0.32%             |
| PR:I85V     | 1                          | 0.32%             |
| PR:L23I     | 1                          | 0.32%             |
| PR:L76V     | 1                          | 0.32%             |
| PR:N83D     | 1                          | 0.32%             |
| RT:D67E     | 1                          | 0.32%             |
| RT:G190E    | 1                          | 0.32%             |
| RT:K101P    | 1                          | 0.32%             |
| RT:V75T     | 1                          | 0.32%             |
| RT:Y181V    | 1                          | 0.32%             |
